# Supplementary material
Source: MDPI journal article supplement (https://www.mdpi.com/2073-4395/13/6/1438)

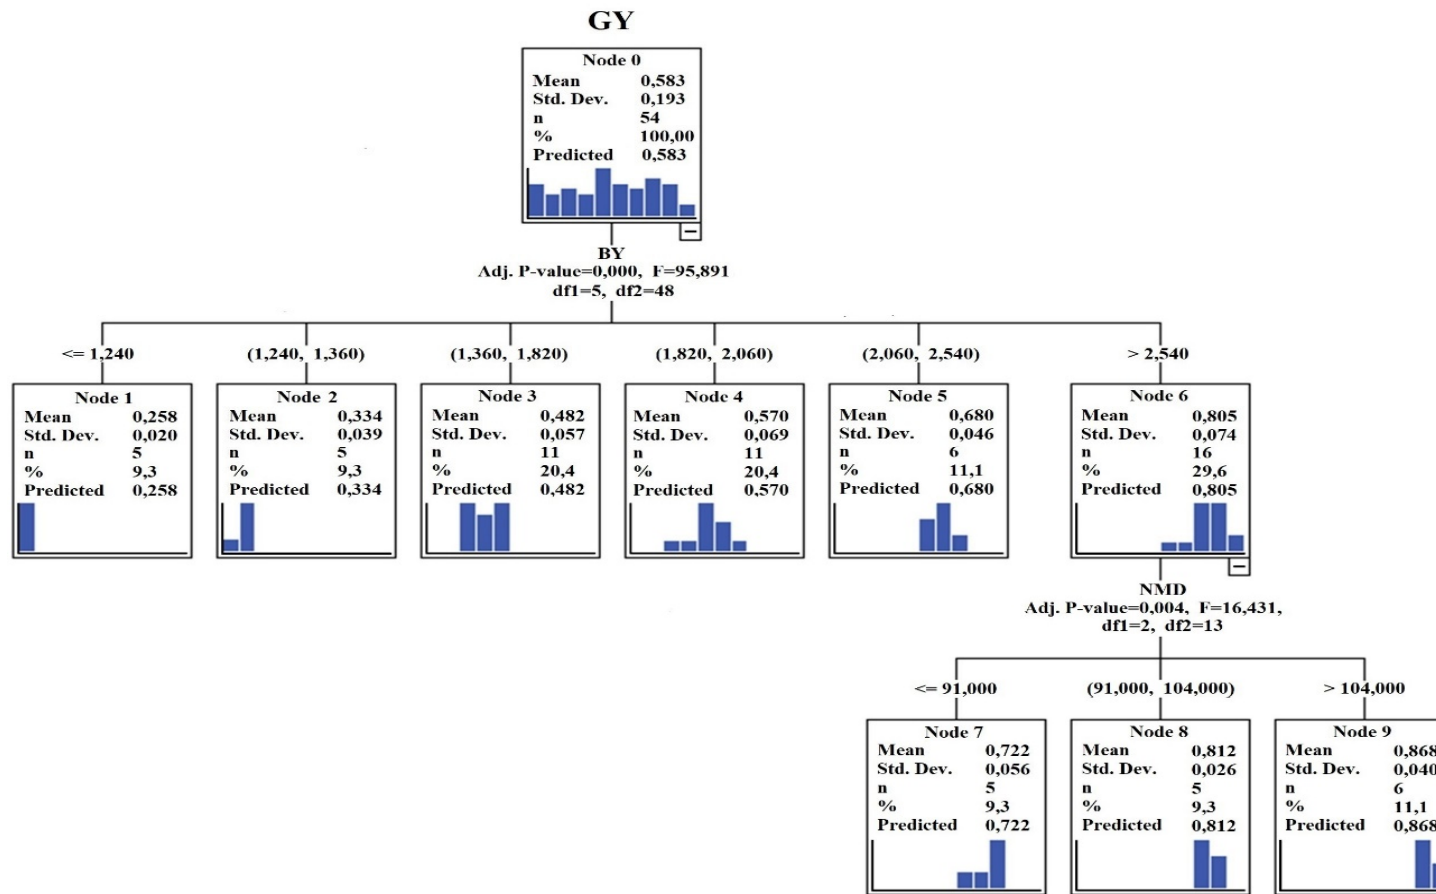

**Figure S1.** The decision tree diagram obtained by CHAID algorithm for grain yield (GY).

Supplement: s1 [file s1]
